# Supplementary material
Source: publisher site journal article supplement (https://www.dovepress.com/article/559022)
Supplement: Supplementary file 1 [file 559022_Supplementary%20Material_1.docx]

| **Table S1** Summary of 10 Genome-wide Significant SNPs Identified from 8 PCOS Risk Loci | | | | | | | | | |
| --- | --- | --- | --- | --- | --- | --- | --- | --- | --- |
| SNP | chr | pos | Nearby gene(s) | A1 | A2 | eaf | beta | se | pval |
| rs2268361 | 2 | 48974473 | FSHR | T | C | 0.496 | -0.139 | 0.020 | 9.89E-13 |
| rs2349415 | 2 | 49020693 | FSHR | T | C | 0.181 | 0.174 | 0.025 | 2.35E-12 |
| rs4385527 | 9 | 94886305 | C9orf3 | A | G | 0.219 | -0.174 | 0.030 | 5.87E-09 |
| rs3802457 | 9 | 94979054 | C9orf3 | A | G | 0.096 | -0.261 | 0.035 | 5.28E-14 |
| rs1894116 | 11 | 102199908 | YAP1 | G | A | 0.194 | 0.239 | 0.024 | 1.08E-22 |
| rs705702 | 12 | 55996852 | RAB5B, SUOX | G | A | 0.245 | 0.239 | 0.023 | 8.64E-26 |
| rs2272046 | 12 | 65830681 | HMGA2 | C | A | 0.093 | -0.357 | 0.038 | 1.95E-21 |
| rs4784165 | 16 | 52313907 | TOX3 | G | T | 0.325 | 0.140 | 0.021 | 3.64E-11 |
| rs2059807 | 19 | 7166098 | INSR | G | A | 0.301 | 0.131 | 0.023 | 1.09E-08 |
| rs6022786 | 20 | 53830764 | SUMO1P1 | A | G | 0.339 | 0.122 | 0.020 | 1.83E-09 |

| **Table S2** LD Trait-Based Annotation and Pruning of SNP Characteristics | | | | | | | | | | | |
| --- | --- | --- | --- | --- | --- | --- | --- | --- | --- | --- | --- |
| Query | GWAS_Trait | PMID | RS_Number | Position_GRCh37 | Alleles | R2 | D' | Risk_Allele | Effect_Size_95_CI | Beta_or_OR | P_value |
| rs2268361 | Polycystic ovary syndrome | 22885925 | rs2268361 | chr2:49201612 | C=0.496, T=0.504 | 1 | 1 | 0.504 | 1.15 |  | 1.00E-12 |
| rs4385527 | Atrial fibrillation | 29892015 | rs4385527 | chr9:97648587 | A=0.175, G=0.825 | 1 | 1 | 0.39 | 1.1 | 1.08-1.11 | 2.00E-36 |
| rs4385527 | Cardioembolic stroke (MTAG) | 35872910 | rs4385527 | chr9:97648587 | A=0.175, G=0.825 | 1 | 1 | NR | 10.34 |  | 5.00E-25 |
| rs3802457 | Polycystic ovary syndrome | 22885925 | rs3802457 | chr9:97741336 | A=0.115, G=0.885 | 1 | 1 | 0.904 | 1.3 |  | 5.00E-14 |
| rs3802457 | Height | 36224396 | rs3802457 | chr9:97741336 | A=0.115, G=0.885 | 1 | 1 | 0.0373 | 0.0126 | 0.0093-0.0159 | 5.00E-13 |
| rs1894116 | Polycystic ovary syndrome | 22885925 | rs1894116 | chr11:102070639 | A=0.816, G=0.184 | 1 | 1 | 0.194 | 1.27 |  | 1.00E-22 |
| rs705702 | Polycystic ovary syndrome | 22885925 | rs705702 | chr12:56390636 | A=0.776, G=0.224 | 1 | 1 | 0.245 | 1.27 |  | 9.00E-26 |
| rs705702 | ICD10 J33: nasal polyps | 36653354 | rs705702 | chr12:56390636 | A=0.776, G=0.224 | 1 | 1 | NR | 1.15 | 1.1-1.19 | 5.00E-16 |
| rs705702 | Nasal polyposis (MTAG) | 36653354 | rs705702 | chr12:56390636 | A=0.776, G=0.224 | 1 | 1 | NR | 1.02 | 1.01-1.03 | 3.00E-08 |
| rs705702 | Pain (pleiotropy) | 37844115 | rs705702 | chr12:56390636 | A=0.776, G=0.224 | 1 | 1 | NR |  |  | 3.00E-06 |
| rs705702 | FEV1 or gastro-oesophageal reflux disease (pleiotropy) | 38102678 | rs705702 | chr12:56390636 | A=0.776, G=0.224 | 1 | 1 | NR |  |  | 2.00E-09 |
| rs705702 | RGMA protein levels | 39789286 | rs705702 | chr12:56390636 | A=0.776, G=0.224 | 1 | 1 | 0.33419204 | 0.04256468 | 0.032-0.053 | 3.00E-18 |
| rs705702 | Eosinophill count (UKB data field 30150) | 39789286 | rs705702 | chr12:56390636 | A=0.776, G=0.224 | 1 | 1 | 0.33707637 | 0.021424606 | 0.017-0.026 | 1.00E-24 |
| rs705702 | NCAM1 protein levels | 39789286 | rs705702 | chr12:56390636 | A=0.776, G=0.224 | 1 | 1 | 0.33419204 | 0.047799375 | 0.037-0.059 | 1.00E-20 |
| rs2272046 | Polycystic ovary syndrome | 22885925 | rs2272046 | chr12:66224461 | A=0.92, C=0.08 | 1 | 1 | 0.907 | 1.43 |  | 2.00E-21 |
| rs2272046 | Height | 36224396 | rs2272046 | chr12:66224461 | A=0.92, C=0.08 | 1 | 1 | 0.0279 | 0.0336 | 0.029-0.039 | 2.00E-39 |
| rs4784165 | Polycystic ovary syndrome | 22885925 | rs4784165 | chr16:52347819 | G=0.359, T=0.641 | 1 | 1 | 0.325 | 1.15 |  | 4.00E-11 |
| rs2059807 | Polycystic ovary syndrome | 22885925 | rs2059807 | chr19:7166109 | A=0.633, G=0.367 | 1 | 1 | 0.301 | 1.14 |  | 1.00E-08 |
| rs2059807 | Gut microbial network clusters (Pink (at 1 year) x Any Breastfeeding (Duration) interaction | 40187613 | rs2059807 | chr19:7166109 | A=0.633, G=0.367 | 1 | 1 | NR | 0.01 |  | 3.00E-07 |
| rs2059807 | Hip circumference adjusted for BMI | 34021172 | rs2059807 | chr19:7166109 | A=0.633, G=0.367 | 1 | 1 | NR | 0.0192012 | 0.013-0.025 | 1.00E-09 |
| rs6022786 | Polycystic ovary syndrome | 22885925 | rs6022786 | chr20:52447303 | A=0.408, G=0.592 | 1 | 1 | 0.339 | 1.13 |  | 2.00E-09 |
| rs6022786 | Cortical surface area | 32193296 | rs6022786 | chr20:52447303 | A=0.408, G=0.592 | 1 | 1 | 0.4147 | 20.937141 | 15.24-26.63 | 6.00E-13 |
| rs6022786 | Brain morphology (min-P) | 32665545 | rs6022786 | chr20:52447303 | A=0.408, G=0.592 | 1 | 1 | NR |  |  | 2.00E-11 |
| rs6022786 | Cortical surface area (min-P) | 32665545 | rs6022786 | chr20:52447303 | A=0.408, G=0.592 | 1 | 1 | NR |  |  | 6.00E-12 |
| rs6022786 | T1 FreeSurfer DKT lh pericalcarine area | 38811844 | rs6022786 | chr20:52447303 | A=0.408, G=0.592 | 1 | 1 | NR | 0.0808336 | 0.047-0.115 | 3.00E-06 |
| rs6022786 | Type 1 diabetes | 39749473 | rs6022786 | chr20:52447303 | A=0.408, G=0.592 | 1 | 1 | 0.4163 | 1.08 | 1.05-1.12 | 2.00E-06 |
| rs6022786 | T1 FreeSurfer DK lh pericalcarine area | 38811844 | rs6022786 | chr20:52447303 | A=0.408, G=0.592 | 1 | 1 | NR | 0.082846 | 0.049-0.117 | 1.00E-06 |

| **Table S3** Summary of Steiger Test Results | | |  |  |  |  |  |
| --- | --- | --- | --- | --- | --- | --- | --- |
| SNP | id.outcome | snp_r2.exposure | effective_n.exp | snp_r2.outcome | effective_n.out | steiger_dir | steiger_pval |
| rs1894116 | GCST90018566 | 0.017969738 | 5255 | 3.72E-07 | 82761 | TRUE | 3.92E-21 |
| rs2059807 | GCST90018566 | 0.006181566 | 5255 | 2.42E-06 | 82761 | TRUE | 5.72E-08 |
| rs2268361 | GCST90018566 | 0.009590333 | 5255 | 6.99E-06 | 82761 | TRUE | 1.84E-11 |
| rs3802457 | GCST90018566 | 0.010664158 | 5255 | 1.06E-07 | 82761 | TRUE | 3.87E-13 |
| rs4385527 | GCST90018566 | 0.006407806 | 5255 | 3.35E-06 | 82761 | TRUE | 3.61E-08 |
| rs4784165 | GCST90018566 | 0.008268847 | 5255 | 2.70E-05 | 82761 | TRUE | 1.51E-09 |
| rs705702 | GCST90018566 | 0.020556483 | 5255 | 1.48E-08 | 82761 | TRUE | 3.78E-24 |
| rs1894116 | GCST90018686 | 0.017969738 | 5255 | 1.20E-07 | 82085 | TRUE | 3.36E-21 |
| rs2059807 | GCST90018686 | 0.006181566 | 5255 | 6.37E-06 | 82085 | TRUE | 8.42E-08 |
| rs2268361 | GCST90018686 | 0.009590333 | 5255 | 7.87E-06 | 82085 | TRUE | 2.01E-11 |
| rs3802457 | GCST90018686 | 0.010664158 | 5255 | 7.01E-05 | 82085 | TRUE | 2.18E-11 |
| rs4385527 | GCST90018686 | 0.006407806 | 5255 | 3.68E-06 | 82085 | TRUE | 3.77E-08 |
| rs4784165 | GCST90018686 | 0.008268847 | 5255 | 1.05E-05 | 82085 | TRUE | 6.47E-10 |
| rs705702 | GCST90018686 | 0.020556483 | 5255 | 6.13E-07 | 82085 | TRUE | 6.23E-24 |
| rs1894116 | GCST90268004 | 0.017969738 | 5255 | 0.004112319 | 1028 | TRUE | 0.038553039 |
| rs2059807 | GCST90268004 | 0.006181566 | 5255 | 3.79E-05 | 1028 | TRUE | 0.033430604 |
| rs2268361 | GCST90268004 | 0.009590333 | 5255 | 0.000708962 | 1028 | TRUE | 0.035977113 |
| rs3802457 | GCST90268004 | 0.010664158 | 5255 | 0.000766922 | 1028 | TRUE | 0.026160983 |
| rs4385527 | GCST90268004 | 0.006407806 | 5255 | 3.62E-06 | 1028 | TRUE | 0.021817881 |
| rs4784165 | GCST90268004 | 0.008268847 | 5255 | 0.00020231 | 1028 | TRUE | 0.024208382 |
| rs705702 | GCST90268004 | 0.020556483 | 5255 | 6.51E-07 | 1028 | TRUE | 2.62E-05 |
| rs1894116 | GCST90268005 | 0.017969738 | 5255 | 0.003588 | 1028 | TRUE | 0.028292559 |
| rs2059807 | GCST90268005 | 0.006181566 | 5255 | 0.000714072 | 1028 | TRUE | 0.1273836 |
| rs2268361 | GCST90268005 | 0.009590333 | 5255 | 0.001472716 | 1028 | TRUE | 0.079648792 |
| rs3802457 | GCST90268005 | 0.010664158 | 5255 | 7.69E-06 | 1028 | TRUE | 0.003138512 |
| rs4385527 | GCST90268005 | 0.006407806 | 5255 | 2.15E-06 | 1028 | TRUE | 0.021093226 |
| rs4784165 | GCST90268005 | 0.008268847 | 5255 | 4.71E-06 | 1028 | TRUE | 0.009139631 |
| rs705702 | GCST90268005 | 0.020556483 | 5255 | 7.63E-05 | 1028 | TRUE | 7.12E-05 |
| rs1894116 | GCST90297786 | 0.017969738 | 5255 | 9.78E-05 | 22882 | TRUE | 3.14E-16 |
| rs2059807 | GCST90297786 | 0.006181566 | 5255 | 1.95E-05 | 22882 | TRUE | 1.17E-06 |
| rs2268361 | GCST90297786 | 0.009590333 | 5255 | 4.08E-05 | 22882 | TRUE | 1.93E-09 |
| rs3802457 | GCST90297786 | 0.010664158 | 5255 | 1.77E-05 | 22882 | TRUE | 8.12E-11 |
| rs4385527 | GCST90297786 | 0.006407806 | 5255 | 1.50E-05 | 22882 | TRUE | 6.04E-07 |
| rs4784165 | GCST90297786 | 0.008268847 | 5255 | 6.59E-07 | 22882 | TRUE | 3.50E-09 |
| rs705702 | GCST90297786 | 0.020556483 | 5255 | 3.75E-05 | 22882 | TRUE | 1.63E-19 |
| rs1894116 | GCST90454199 | 0.017969738 | 5255 | 4.03E-08 | 98269 | TRUE | 1.94E-21 |
| rs2059807 | GCST90454199 | 0.006181566 | 5255 | 4.19E-06 | 98269 | TRUE | 6.01E-08 |
| rs2268361 | GCST90454199 | 0.009590333 | 5255 | 1.97E-05 | 98269 | TRUE | 3.50E-11 |
| rs3802457 | GCST90454199 | 0.010664158 | 5255 | 4.33E-06 | 98269 | TRUE | 7.46E-13 |
| rs4385527 | GCST90454199 | 0.006407806 | 5255 | 3.65E-05 | 98269 | TRUE | 1.63E-07 |
| rs4784165 | GCST90454199 | 0.008268847 | 5255 | 1.90E-06 | 98269 | TRUE | 2.28E-10 |
| rs705702 | GCST90454199 | 0.020556483 | 5255 | 1.06E-05 | 98269 | TRUE | 2.20E-23 |

| **Table S4** Full Summary of SNP Information Used for Analysis | | | | | | | | | | | | | |
| --- | --- | --- | --- | --- | --- | --- | --- | --- | --- | --- | --- | --- | --- |
| SNP | chr | pos | A1 | A2 | beta.exposure | beta.outcome | eaf.exposure | eaf.outcome | se.exposure | se.outcome | pval.exposure | pval.outcome | id.outcome |
| rs1894116 | 11 | 102070639 | G | A | 0.239 | -0.033 | 0.194 | 0.116 | 0.024 | 0.188 | 1.08E-22 | 0.861 | GCST90018566 |
| rs2059807 | 19 | 7166109 | G | A | 0.131 | -0.061 | 0.301 | 0.268 | 0.023 | 0.137 | 1.09E-08 | 0.655 | GCST90018566 |
| rs2268361 | 2 | 49201612 | T | C | -0.139 | -0.092 | 0.496 | 0.536 | 0.020 | 0.122 | 9.89E-13 | 0.447 | GCST90018566 |
| rs3802457 | 9 | 97741336 | A | G | -0.261 | -0.025 | 0.096 | 0.055 | 0.035 | 0.263 | 5.28E-14 | 0.925 | GCST90018566 |
| rs4385527 | 9 | 97648587 | A | G | -0.174 | -0.077 | 0.219 | 0.219 | 0.030 | 0.146 | 5.87E-09 | 0.598 | GCST90018566 |
| rs4784165 | 16 | 52347819 | G | T | 0.140 | -0.200 | 0.325 | 0.292 | 0.021 | 0.134 | 3.64E-11 | 0.135 | GCST90018566 |
| rs705702 | 12 | 56390636 | G | A | 0.239 | -0.005 | 0.245 | 0.209 | 0.023 | 0.150 | 8.64E-26 | 0.972 | GCST90018566 |
| rs1894116 | 11 | 102070639 | G | A | 0.239 | -0.020 | 0.194 | 0.116 | 0.024 | 0.198 | 1.08E-22 | 0.921 | GCST90018686 |
| rs2059807 | 19 | 7166109 | G | A | 0.131 | -0.103 | 0.301 | 0.268 | 0.023 | 0.143 | 1.09E-08 | 0.470 | GCST90018686 |
| rs2268361 | 2 | 49201612 | T | C | -0.139 | 0.102 | 0.496 | 0.536 | 0.020 | 0.127 | 9.89E-13 | 0.422 | GCST90018686 |
| rs3802457 | 9 | 97741336 | A | G | -0.261 | -0.663 | 0.096 | 0.055 | 0.035 | 0.277 | 5.28E-14 | 0.016 | GCST90018686 |
| rs4385527 | 9 | 97648587 | A | G | -0.174 | 0.084 | 0.219 | 0.219 | 0.030 | 0.153 | 5.87E-09 | 0.583 | GCST90018686 |
| rs4784165 | 16 | 52347819 | G | T | 0.140 | 0.130 | 0.325 | 0.292 | 0.021 | 0.140 | 3.64E-11 | 0.353 | GCST90018686 |
| rs705702 | 12 | 56390636 | G | A | 0.239 | -0.035 | 0.245 | 0.208 | 0.023 | 0.157 | 8.64E-26 | 0.823 | GCST90018686 |
| rs1894116 | 11 | 102199908 | G | A | 0.239 | 0.290 | 0.194 | 0.102 | 0.024 | 0.141 | 1.08E-22 | 0.039 | GCST90268004 |
| rs2059807 | 19 | 7166098 | G | A | 0.131 | -0.020 | 0.301 | 0.275 | 0.023 | 0.102 | 1.09E-08 | 0.844 | GCST90268004 |
| rs2268361 | 2 | 48974473 | T | C | -0.139 | -0.078 | 0.496 | 0.535 | 0.020 | 0.091 | 9.89E-13 | 0.396 | GCST90268004 |
| rs3802457 | 9 | 94979054 | A | G | -0.261 | 0.193 | 0.096 | 0.041 | 0.035 | 0.218 | 5.28E-14 | 0.374 | GCST90268004 |
| rs4385527 | 9 | 94886305 | A | G | -0.174 | -0.007 | 0.219 | 0.229 | 0.030 | 0.109 | 5.87E-09 | 0.951 | GCST90268004 |
| rs4784165 | 16 | 52313907 | G | T | 0.140 | 0.046 | 0.325 | 0.281 | 0.021 | 0.101 | 3.64E-11 | 0.651 | GCST90268004 |
| rs705702 | 12 | 55996852 | G | A | 0.239 | 0.003 | 0.245 | 0.191 | 0.023 | 0.116 | 8.64E-26 | 0.982 | GCST90268004 |
| rs1894116 | 11 | 102199908 | G | A | 0.239 | -0.131 | 0.194 | 0.113 | 0.024 | 0.068 | 1.08E-22 | 0.055 | GCST90268005 |
| rs2059807 | 19 | 7166098 | G | A | 0.131 | 0.042 | 0.301 | 0.273 | 0.023 | 0.050 | 1.09E-08 | 0.392 | GCST90268005 |
| rs2268361 | 2 | 48974473 | T | C | -0.139 | 0.052 | 0.496 | 0.528 | 0.020 | 0.043 | 9.89E-13 | 0.219 | GCST90268005 |
| rs3802457 | 9 | 94979054 | A | G | -0.261 | -0.009 | 0.096 | 0.044 | 0.035 | 0.104 | 5.28E-14 | 0.929 | GCST90268005 |
| rs4385527 | 9 | 94886305 | A | G | -0.174 | -0.002 | 0.219 | 0.229 | 0.030 | 0.050 | 5.87E-09 | 0.963 | GCST90268005 |
| rs4784165 | 16 | 52313907 | G | T | 0.140 | -0.003 | 0.325 | 0.285 | 0.021 | 0.048 | 3.64E-11 | 0.945 | GCST90268005 |
| rs705702 | 12 | 55996852 | G | A | 0.239 | -0.015 | 0.245 | 0.191 | 0.023 | 0.053 | 8.64E-26 | 0.780 | GCST90268005 |
| rs1894116 | 11 | 102199908 | G | A | 0.239 | 0.068 | 0.194 | 0.192 | 0.024 | 0.045 | 1.08E-22 | 0.135 | GCST90297786 |
| rs2059807 | 19 | 7166098 | G | A | 0.131 | 0.027 | 0.301 | 0.328 | 0.023 | 0.041 | 1.09E-08 | 0.505 | GCST90297786 |
| rs2268361 | 2 | 48974473 | T | C | -0.139 | -0.034 | 0.496 | 0.490 | 0.020 | 0.035 | 9.89E-13 | 0.334 | GCST90297786 |
| rs3802457 | 9 | 94979054 | A | G | -0.261 | -0.033 | 0.096 | 0.117 | 0.035 | 0.051 | 5.28E-14 | 0.525 | GCST90297786 |
| rs4385527 | 9 | 94886305 | A | G | -0.174 | -0.031 | 0.219 | 0.150 | 0.030 | 0.054 | 5.87E-09 | 0.558 | GCST90297786 |
| rs4784165 | 16 | 52313907 | G | T | 0.140 | -0.005 | 0.325 | 0.384 | 0.021 | 0.042 | 3.64E-11 | 0.902 | GCST90297786 |
| rs705702 | 12 | 55996852 | G | A | 0.239 | 0.046 | 0.245 | 0.215 | 0.023 | 0.050 | 8.64E-26 | 0.355 | GCST90297786 |
| rs1894116 | 11 | 102199908 | G | A | 0.239 | -0.003 | 0.194 | 0.197 | 0.024 | 0.041 | 1.08E-22 | 0.949 | GCST90454199 |
| rs2059807 | 19 | 7166098 | G | A | 0.131 | 0.033 | 0.301 | 0.303 | 0.023 | 0.052 | 1.09E-08 | 0.522 | GCST90454199 |
| rs2268361 | 2 | 48974473 | T | C | -0.139 | 0.036 | 0.496 | 0.496 | 0.020 | 0.026 | 9.89E-13 | 0.164 | GCST90454199 |
| rs3802457 | 9 | 94979054 | A | G | -0.261 | 0.023 | 0.096 | 0.093 | 0.035 | 0.035 | 5.28E-14 | 0.515 | GCST90454199 |
| rs4385527 | 9 | 94886305 | A | G | -0.174 | -0.067 | 0.219 | 0.170 | 0.030 | 0.035 | 5.87E-09 | 0.058 | GCST90454199 |
| rs4784165 | 16 | 52313907 | G | T | 0.140 | 0.017 | 0.325 | 0.352 | 0.021 | 0.040 | 3.64E-11 | 0.666 | GCST90454199 |
| rs705702 | 12 | 55996852 | G | A | 0.239 | -0.049 | 0.245 | 0.243 | 0.023 | 0.048 | 8.64E-26 | 0.307 | GCST90454199 |

| **Table S5** Summary of Two-Sample Univariable Causal Estimates | | | | | | | | | | | |
| --- | --- | --- | --- | --- | --- | --- | --- | --- | --- | --- | --- |
| id.exposure | id.outcome | method | nsnp | b | se | lo_ci | up_ci | or | or_lci95 | or_uci95 | pval |
| PCOS | GCST90018566 | IVW (fixed effects) | 7 | -0.068 | 0.318 | -0.692 | 0.555 | 0.934 | 0.501 | 1.742 | 0.830 |
| PCOS | GCST90018566 | IVW (random effects) | 7 | -0.068 | 0.318 | -0.692 | 0.555 | 0.934 | 0.501 | 1.742 | 0.830 |
| PCOS | GCST90018566 | MR Egger | 7 | 0.382 | 1.229 | -2.026 | 2.791 | 1.466 | 0.132 | 16.296 | 0.768 |
| PCOS | GCST90018566 | Weighted median | 7 | -0.017 | 0.399 | -0.800 | 0.765 | 0.983 | 0.449 | 2.149 | 0.965 |
| PCOS | GCST90018566 | ConMix | 7 | 0.104 | 0.860 | -1.581 | 1.789 | 1.109 | 0.206 | 5.981 | 0.765 |
| PCOS | GCST90018566 | dIVW | 7 | -0.070 | 0.324 | -0.705 | 0.565 | 0.933 | 0.494 | 1.760 | 0.830 |
| PCOS | GCST90018566 | BWMR | 7 | -0.070 | 0.324 | -0.704 | 0.564 | 0.933 | 0.495 | 1.758 | 0.829 |
| PCOS | GCST90018686 | IVW (fixed effects) | 7 | 0.062 | 0.333 | -0.591 | 0.716 | 1.064 | 0.554 | 2.045 | 0.851 |
| PCOS | GCST90018686 | IVW (random effects) | 7 | 0.062 | 0.387 | -0.697 | 0.822 | 1.064 | 0.498 | 2.274 | 0.872 |
| PCOS | GCST90018686 | MR Egger | 7 | 1.389 | 1.521 | -1.592 | 4.371 | 4.012 | 0.203 | 79.102 | 0.403 |
| PCOS | GCST90018686 | Weighted median | 7 | -0.152 | 0.429 | -0.993 | 0.688 | 0.859 | 0.370 | 1.991 | 0.722 |
| PCOS | GCST90018686 | ConMix | 7 | -0.211 | 0.398 | -0.991 | 0.569 | 0.810 | 0.371 | 1.766 | 0.550 |
| PCOS | GCST90018686 | dIVW | 7 | 0.064 | 0.365 | -0.652 | 0.779 | 1.066 | 0.521 | 2.180 | 0.862 |
| PCOS | GCST90018686 | BWMR | 7 | 0.044 | 0.347 | -0.637 | 0.725 | 1.045 | 0.529 | 2.066 | 0.898 |
| PCOS | GCST90268004 | IVW (fixed effects) | 7 | 0.250 | 0.242 | -0.225 | 0.725 | 1.284 | 0.798 | 2.064 | 0.303 |
| PCOS | GCST90268004 | IVW (random effects) | 7 | 0.250 | 0.242 | -0.225 | 0.725 | 1.284 | 0.798 | 2.064 | 0.303 |
| PCOS | GCST90268004 | MR Egger | 7 | 0.251 | 0.945 | -1.602 | 2.103 | 1.285 | 0.202 | 8.194 | 0.801 |
| PCOS | GCST90268004 | Weighted median | 7 | 0.037 | 0.319 | -0.589 | 0.662 | 1.037 | 0.555 | 1.939 | 0.909 |
| PCOS | GCST90268004 | ConMix | 7 | 0.053 | 0.640 | -1.202 | 1.308 | 1.054 | 0.301 | 3.698 | 0.839 |
| PCOS | GCST90268004 | dIVW | 7 | 0.254 | 0.247 | -0.230 | 0.739 | 1.290 | 0.794 | 2.093 | 0.303 |
| PCOS | GCST90268004 | BWMR | 7 | 0.253 | 0.247 | -0.231 | 0.738 | 1.288 | 0.793 | 2.092 | 0.305 |
| PCOS | GCST90268005 | IVW (fixed effects) | 7 | -0.124 | 0.114 | -0.346 | 0.099 | 0.884 | 0.707 | 1.104 | 0.277 |
| PCOS | GCST90268005 | IVW (random effects) | 7 | -0.124 | 0.114 | -0.346 | 0.099 | 0.884 | 0.707 | 1.104 | 0.277 |
| PCOS | GCST90268005 | MR Egger | 7 | -0.376 | 0.445 | -1.247 | 0.496 | 0.687 | 0.287 | 1.641 | 0.437 |
| PCOS | GCST90268005 | Weighted median | 7 | -0.047 | 0.150 | -0.340 | 0.247 | 0.954 | 0.712 | 1.280 | 0.756 |
| PCOS | GCST90268005 | ConMix | 7 | -0.171 | 0.304 | -0.766 | 0.424 | 0.843 | 0.465 | 1.528 | 0.663 |
| PCOS | GCST90268005 | dIVW | 7 | -0.126 | 0.116 | -0.353 | 0.101 | 0.882 | 0.703 | 1.107 | 0.277 |
| PCOS | GCST90268005 | BWMR | 7 | -0.126 | 0.116 | -0.353 | 0.102 | 0.882 | 0.703 | 1.107 | 0.279 |
| PCOS | GCST90297786 | IVW (fixed effects) | 7 | 0.185 | 0.089 | 0.009 | 0.360 | 1.203 | 1.009 | 1.433 | 0.039 |
| PCOS | GCST90297786 | IVW (random effects) | 7 | 0.185 | 0.089 | 0.009 | 0.360 | 1.203 | 1.009 | 1.433 | 0.039 |
| PCOS | GCST90297786 | MR Egger | 7 | 0.248 | 0.327 | -0.393 | 0.889 | 1.281 | 0.675 | 2.432 | 0.482 |
| PCOS | GCST90297786 | Weighted median | 7 | 0.195 | 0.106 | -0.012 | 0.402 | 1.215 | 0.988 | 1.494 | 0.065 |
| PCOS | GCST90297786 | ConMix | 7 | 0.208 | 0.110 | -0.007 | 0.423 | 1.231 | 1.141 | 1.526 | 0.040 |
| PCOS | GCST90297786 | dIVW | 7 | 0.188 | 0.092 | 0.008 | 0.367 | 1.207 | 1.008 | 1.444 | 0.040 |
| PCOS | GCST90297786 | BWMR | 7 | 0.186 | 0.091 | 0.007 | 0.365 | 1.204 | 1.007 | 1.440 | 0.042 |
| PCOS | GCST90454199 | IVW (fixed effects) | 7 | -0.029 | 0.073 | -0.172 | 0.114 | 0.972 | 0.842 | 1.121 | 0.694 |
| PCOS | GCST90454199 | IVW (random effects) | 7 | -0.029 | 0.081 | -0.188 | 0.131 | 0.972 | 0.829 | 1.139 | 0.723 |
| PCOS | GCST90454199 | MR Egger | 7 | -0.145 | 0.328 | -0.788 | 0.499 | 0.865 | 0.455 | 1.647 | 0.678 |
| PCOS | GCST90454199 | Weighted median | 7 | -0.069 | 0.098 | -0.261 | 0.123 | 0.933 | 0.770 | 1.131 | 0.480 |
| PCOS | GCST90454199 | ConMix | 7 | -0.094 | 0.204 | -0.494 | 0.306 | 0.910 | 0.610 | 1.358 | 0.246 |
| PCOS | GCST90454199 | dIVW | 7 | -0.029 | 0.077 | -0.180 | 0.121 | 0.971 | 0.835 | 1.129 | 0.703 |
| PCOS | GCST90454199 | BWMR | 7 | -0.023 | 0.087 | -0.194 | 0.148 | 0.977 | 0.823 | 1.159 | 0.788 |

| **Table S6** Statistical Power Assessment in Causal Inference | | | | | |  |  |  |  |
| --- | --- | --- | --- | --- | --- | --- | --- | --- | --- |
| Exposure | outcome | cases | controls | samplesize | Proportion of cases in the study | Method | R2 | OR | Power |
| PCOS | GDM | 3317 | 19565 | 22882 | 0.144961105 | IVW (fixed effects) | 8.67% | 1.203 | 87% |
| PCOS | GDM | 3317 | 19565 | 22882 | 0.144961105 | IVW (random effects) | 8.67% | 1.203 | 87% |
| PCOS | GDM | 3317 | 19565 | 22882 | 0.144961105 | MR Egger | 8.67% | 1.281 | 99% |
| PCOS | GDM | 3317 | 19565 | 22882 | 0.144961105 | Weighted median | 8.67% | 1.215 | 91% |
| PCOS | GDM | 3317 | 19565 | 22882 | 0.144961105 | ConMix | 8.67% | 1.231 | 94% |
| PCOS | GDM | 3317 | 19565 | 22882 | 0.144961105 | dIVW | 8.67% | 1.207 | 88% |
| PCOS | GDM | 3317 | 19565 | 22882 | 0.144961105 | BWMR | 8.67% | 1.204 | 88% |
| PCOS | GDM | 3317 | 19565 | 22882 | 0.144961105 | MR-PRESSO | 8.67% | 1.203 | 87% |

| **Table S7** Summary of Heterogeneity Results from Cochran’s Q Test (Two Methods) | | | | | | | | |  |
| --- | --- | --- | --- | --- | --- | --- | --- | --- | --- |
| Exposure | Outcome | IVW | | |  | MR Egger | | | ***I2*** |
| ***Q*** | ***Q_df*** | ***Q_pval*** |  | ***Q*** | ***Q_df*** | ***Q_pval*** |
| PCOS | GCST90018566 | 3.286 | 6 | 0.772 |  | 3.142 | 5 | 0.678 | 0% |
| PCOS | GCST90018686 | 8.110 | 6 | 0.230 |  | 6.973 | 5 | 0.223 | 26% |
| PCOS | GCST90268004 | 4.941 | 6 | 0.551 |  | 4.941 | 5 | 0.423 | 0% |
| PCOS | GCST90268005 | 4.851 | 6 | 0.563 |  | 4.507 | 5 | 0.479 | 0% |
| PCOS | GCST90297786 | 0.980 | 6 | 0.986 |  | 0.940 | 5 | 0.967 | 0% |
| PCOS | GCST90454199 | 7.438 | 6 | 0.282 |  | 7.243 | 5 | 0.203 | 16% |

| **Table S8** Assessment of Horizontal Pleiotropy via MR-Egger Regression | | | | |
| --- | --- | --- | --- | --- |
| **Exposure** | **Outcome** | **MR-Egger regression** | | |
| **Intercept** | **SE** | ***Pval*** |
| PCOS | GCST90018566 | -0.083 | 0.219 | 0.720 |
| PCOS | GCST90018686 | -0.245 | 0.271 | 0.408 |
| PCOS | GCST90268004 | 0.000 | 0.167 | 0.999 |
| PCOS | GCST90268005 | 0.046 | 0.079 | 0.583 |
| PCOS | GCST90297786 | -0.012 | 0.061 | 0.848 |
| PCOS | GCST90454199 | 0.023 | 0.063 | 0.729 |

| **Table S9** MR-PRESSO Global Test for Horizontal Pleiotropy and Outlier Detection | | | | |
| --- | --- | --- | --- | --- |
| **Exposure** | **Outcome** | **MR-PRESSO** | | |
| **RSSobs** | ***Pvalglobal test*** | **Outlier** |
| PCOS | GCST90018566 | 4.233 | *0.814* | NA |
| PCOS | GCST90018686 | 10.200 | *0.293* | NA |
| PCOS | GCST90268004 | 6.77755 | 0.558 | NA |
| PCOS | GCST90268005 | 6.499875 | 0.591 | NA |
| PCOS | GCST90297786 | 1.348594 | 0.992 | NA |
| PCOS | GCST90454199 | 9.94941 | 0.327 | NA |

| **Table S10** Summary of MR-PRESSO Distortion Test Results | | | | |  |  |  |  |  |  |
| --- | --- | --- | --- | --- | --- | --- | --- | --- | --- | --- |
| id.exposure | id.outcome | Causal Estimate | Sd | T-stat | lo_ci | up_ci | or | or_lci95 | or_uci95 | P-value |
| PCOS | GCST90018566 | -0.068 | 0.235 | -0.290 | -0.530 | 0.393 | 0.934 | 0.589 | 1.481 | 0.781 |
| PCOS | GCST90018686 | 0.062 | 0.387 | 0.161 | -0.697 | 0.822 | 1.064 | 0.498 | 2.274 | 0.877 |
| PCOS | GCST90268004 | 0.250 | 0.220 | 1.136 | -0.181 | 0.681 | 1.284 | 0.834 | 1.975 | 0.299 |
| PCOS | GCST90268005 | -0.124 | 0.102 | -1.210 | -0.324 | 0.077 | 0.884 | 0.723 | 1.080 | 0.272 |
| PCOS | GCST90297786 | 0.185 | 0.036 | 5.103 | 0.114 | 0.255 | 1.203 | 1.120 | 1.291 | 0.002 |
| PCOS | GCST90454199 | -0.029 | 0.081 | -0.354 | -0.188 | 0.131 | 0.972 | 0.829 | 1.139 | 0.736 |

| **Table S11** Leave-One-Out Sensitivity Analysis Results | | | | | | |
| --- | --- | --- | --- | --- | --- | --- |
| id.exposure | id.outcome | n | SNP | b | se | p |
| PCOS | GCST90018566 | 82761 | rs1894116 | -0.055 | 0.348 | 0.875 |
| PCOS | GCST90018566 | 82761 | rs2059807 | -0.028 | 0.334 | 0.934 |
| PCOS | GCST90018566 | 82761 | rs2268361 | -0.180 | 0.342 | 0.597 |
| PCOS | GCST90018566 | 82761 | rs3802457 | -0.086 | 0.335 | 0.797 |
| PCOS | GCST90018566 | 82761 | rs4385527 | -0.154 | 0.344 | 0.654 |
| PCOS | GCST90018566 | 82761 | rs4784165 | 0.101 | 0.337 | 0.765 |
| PCOS | GCST90018566 | 82761 | rs705702 | -0.084 | 0.369 | 0.819 |
| PCOS | GCST90018566 | 82761 | All | -0.068 | 0.318 | 0.830 |
| PCOS | GCST90018686 | 82085 | rs1894116 | 0.090 | 0.463 | 0.845 |
| PCOS | GCST90018686 | 82085 | rs2059807 | 0.150 | 0.427 | 0.725 |
| PCOS | GCST90018686 | 82085 | rs2268361 | 0.185 | 0.430 | 0.668 |
| PCOS | GCST90018686 | 82085 | rs3802457 | -0.210 | 0.351 | 0.550 |
| PCOS | GCST90018686 | 82085 | rs4385527 | 0.155 | 0.446 | 0.729 |
| PCOS | GCST90018686 | 82085 | rs4784165 | -0.046 | 0.426 | 0.915 |
| PCOS | GCST90018686 | 82085 | rs705702 | 0.135 | 0.488 | 0.782 |
| PCOS | GCST90018686 | 82085 | All | 0.062 | 0.387 | 0.872 |
| PCOS | GCST90268004 | 1028 | rs1894116 | 0.054 | 0.266 | 0.839 |
| PCOS | GCST90268004 | 1028 | rs2059807 | 0.293 | 0.255 | 0.251 |
| PCOS | GCST90268004 | 1028 | rs2268361 | 0.201 | 0.261 | 0.441 |
| PCOS | GCST90268004 | 1028 | rs3802457 | 0.341 | 0.253 | 0.178 |
| PCOS | GCST90268004 | 1028 | rs4385527 | 0.287 | 0.263 | 0.274 |
| PCOS | GCST90268004 | 1028 | rs4784165 | 0.240 | 0.257 | 0.352 |
| PCOS | GCST90268004 | 1028 | rs705702 | 0.329 | 0.280 | 0.240 |
| PCOS | GCST90268004 | 1028 | All | 0.250 | 0.242 | 0.303 |
| PCOS | GCST90268005 | 1028 | rs1894116 | -0.044 | 0.124 | 0.724 |
| PCOS | GCST90268005 | 1028 | rs2059807 | -0.168 | 0.119 | 0.158 |
| PCOS | GCST90268005 | 1028 | rs2268361 | -0.083 | 0.122 | 0.497 |
| PCOS | GCST90268005 | 1028 | rs3802457 | -0.138 | 0.119 | 0.245 |
| PCOS | GCST90268005 | 1028 | rs4385527 | -0.149 | 0.124 | 0.229 |
| PCOS | GCST90268005 | 1028 | rs4784165 | -0.136 | 0.121 | 0.259 |
| PCOS | GCST90268005 | 1028 | rs705702 | -0.146 | 0.133 | 0.271 |
| PCOS | GCST90268005 | 1028 | All | -0.124 | 0.114 | 0.277 |
| PCOS | GCST90297786 | 22882 | rs1894116 | 0.156 | 0.101 | 0.124 |
| PCOS | GCST90297786 | 22882 | rs2059807 | 0.183 | 0.093 | 0.051 |
| PCOS | GCST90297786 | 22882 | rs2268361 | 0.176 | 0.096 | 0.066 |
| PCOS | GCST90297786 | 22882 | rs3802457 | 0.200 | 0.101 | 0.046 |
| PCOS | GCST90297786 | 22882 | rs4385527 | 0.185 | 0.094 | 0.048 |
| PCOS | GCST90297786 | 22882 | rs4784165 | 0.207 | 0.094 | 0.028 |
| PCOS | GCST90297786 | 22882 | rs705702 | 0.183 | 0.099 | 0.065 |
| PCOS | GCST90297786 | 22882 | All | 0.185 | 0.089 | 0.039 |
| PCOS | GCST90454199 | 98269 | rs1894116 | -0.033 | 0.098 | 0.739 |
| PCOS | GCST90454199 | 98269 | rs2059807 | -0.039 | 0.087 | 0.657 |
| PCOS | GCST90454199 | 98269 | rs2268361 | 0.014 | 0.084 | 0.871 |
| PCOS | GCST90454199 | 98269 | rs3802457 | -0.004 | 0.104 | 0.971 |
| PCOS | GCST90454199 | 98269 | rs4385527 | -0.091 | 0.078 | 0.246 |
| PCOS | GCST90454199 | 98269 | rs4784165 | -0.039 | 0.090 | 0.663 |
| PCOS | GCST90454199 | 98269 | rs705702 | -0.002 | 0.090 | 0.984 |
| PCOS | GCST90454199 | 98269 | All | -0.029 | 0.081 | 0.723 |

| **Table S12** Summary of results from two-step mediated Mendelian randomization analysis | | | | | | | |
| --- | --- | --- | --- | --- | --- | --- | --- |
| Exposure | Mediator | Outcome | Confidence Interval of Total Effect (95% CI) | Confidence Interval of Direct Effect (95% CI) | Confidence Interval of Mediation Effect (95% CI) | Proportion of Mediation Effect (95% CI) | *Pval* |
| PCOS | HDL-C | GDM | 0.185 (0.009, 0.360) | 0.191 (0.015, 0.367) | -0.006 (-0.021, 0.009) | -3.47% (-11.59%, 4.65%) | 0.386 |
| PCOS | LDL-C | GDM | 0.185 (0.009, 0.360) | 0.185 (0.009, 0.360) | 0.000 (-0.007, 0.006) | -0.13% (-3.61%, 3.34%) | 0.927 |
| PCOS | TC | GDM | 0.185 (0.009, 0.360) | 0.184 (0.008, 0.360) | 0.001 (-0.008, 0.009) | 0.29% (-4.34%, 4.91%) | 0.894 |
| PCOS | TG | GDM | 0.185 (0.009, 0.360) | 0.184 (0.009, 0.360) | 0.000 (-0.007, 0.008) | 0.24% (-3.82%, 4.29%) | 0.891 |
| PCOS | BMI | GDM | 0.185 (0.009, 0.360) | 0.184 (0.009, 0.359) | 0.001 (-0.004, 0.005) | 0.30% (-2.22%, 2.82%) | 0.722 |
| PCOS | FI | GDM | 0.185 (0.009, 0.360) | 0.182 (0.006, 0.359) | 0.002 (-0.018, 0.022) | 1.18% (-9.78%, 12.15%) | 0.737 |
| PCOS | HbA1c | GDM | 0.185 (0.009, 0.360) | 0.175 (-0.002, 0.352) | 0.010 (-0.013, 0.033) | 5.27% (-7.26%, 17.80%) | 0.387 |


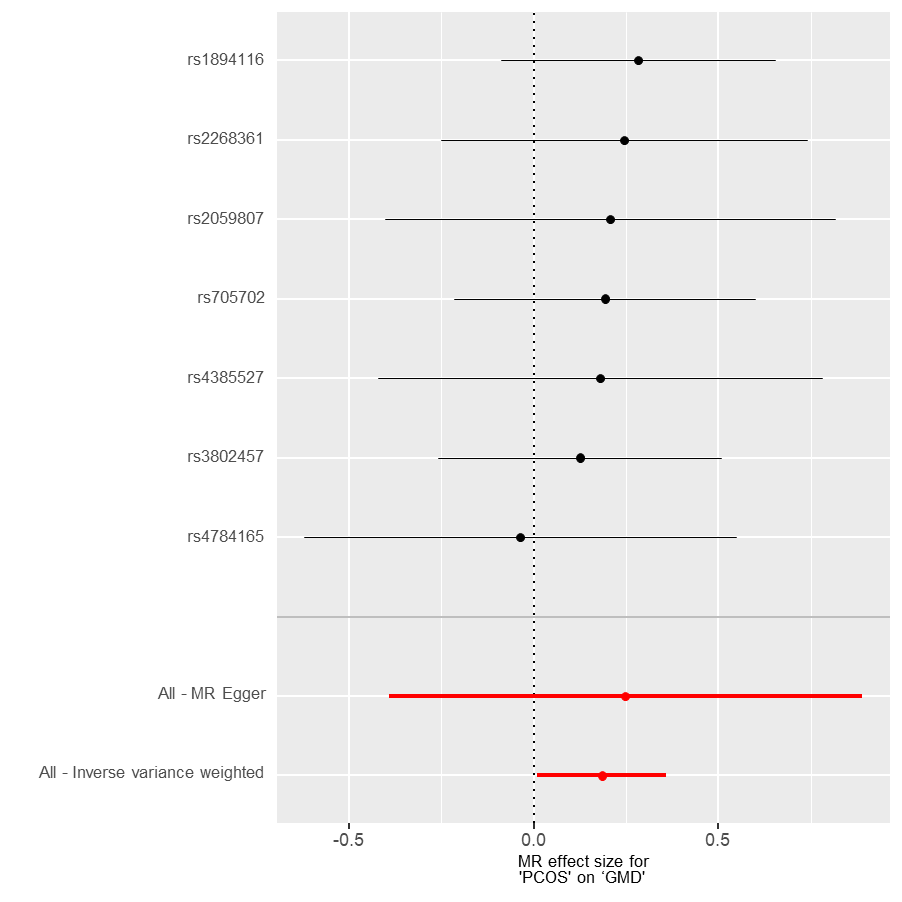


**Fig. S1** Forest Plot of Individual Causal Estimates for Each SNP in the Positive Association Between PCOS and GDM. The overall causal effect was estimated as a weighted average of individual SNP effects, with rs1894116 contributing the most.


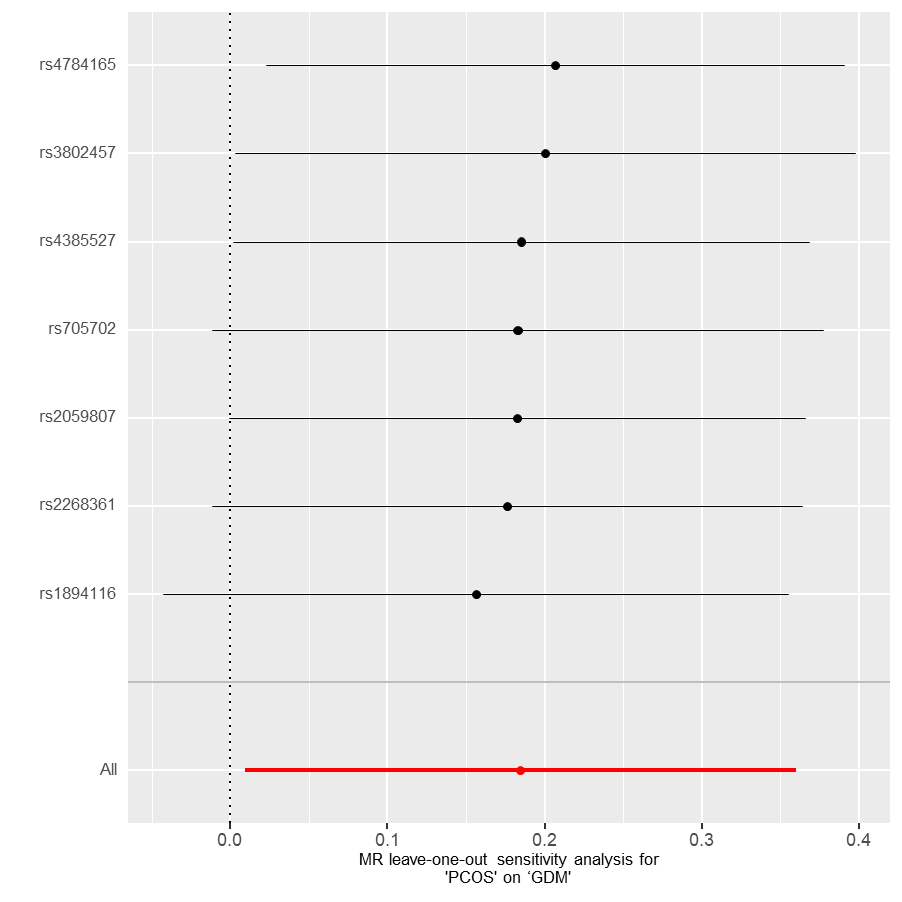


**Fig. S2** Leave-One-Out Sensitivity Analysis for the Positive Association Between PCOS and GDM


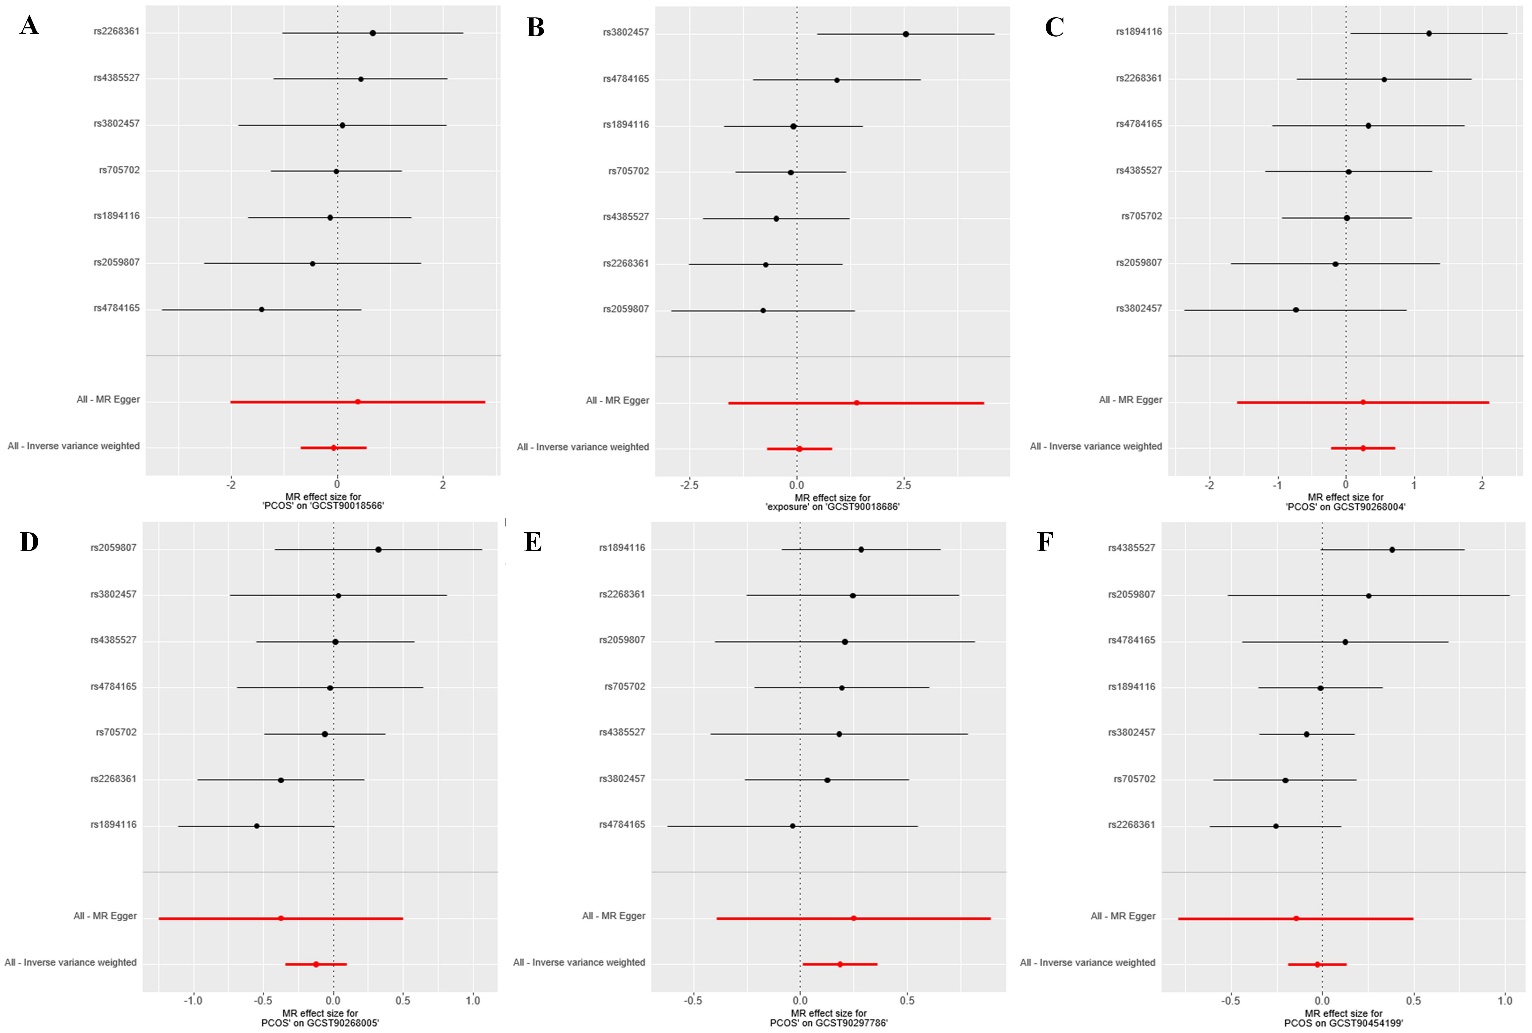


**Fig. S3. Forest plots summarizing the effect estimates contributed by each SNP in the single-SNP analyses.** (A) PCOS on miscarriage; (B) PCOS on preeclampsia; (C) PCOS on PTB; (D) PCOS on gestational age at birth; (E) PCOS on GDM; (F) PCOS on ICP.


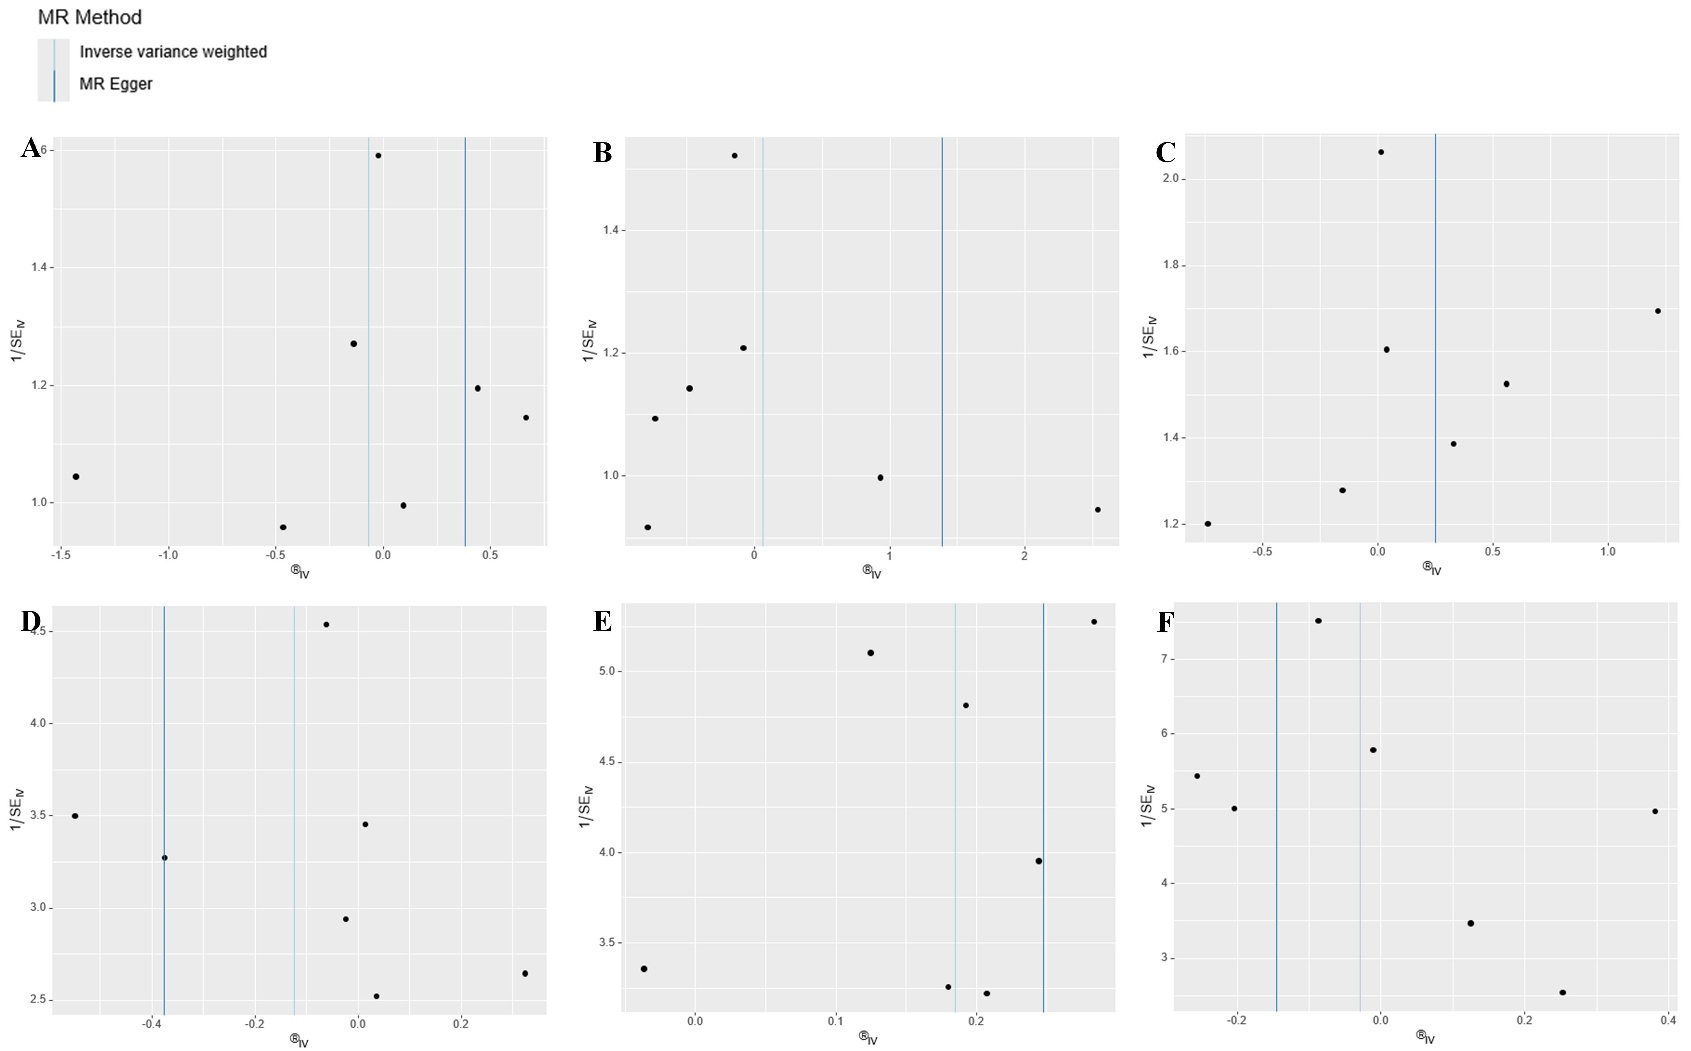


**Fig. S4. Funnel plots summarizing the analyses.** (A) PCOS on miscarriage; (B) PCOS on preeclampsia; (C) PCOS on PTB; (D) PCOS on gestational age at birth; (E) PCOS on GDM; (F) PCOS on ICP. The x-axis, , denotes the estimated causal effect (regression coefficient) from the instrumental-variable (IV) analysis for each SNP (Wald ratio: ); “IV” indicates “instrumental variable.” The y-axis shows , the inverse standard error (precision) of . Vertical lines indicate the pooled causal estimates from IVW and MR-Egger.
